# Supplementary material for: LncRNA INPP5F ameliorates stress‐induced hypertension via the miR‐335/Cttn axis in rostral ventrolateral medulla
Source: PubMed Central journal article supplement (PMC10324364; doi:10.1111/cns.14142), 2023-02-27
Supplement: CNS-29-1830-s001.pdf [file CNS-29-1830-s001.pdf]

## Supplementary Figures

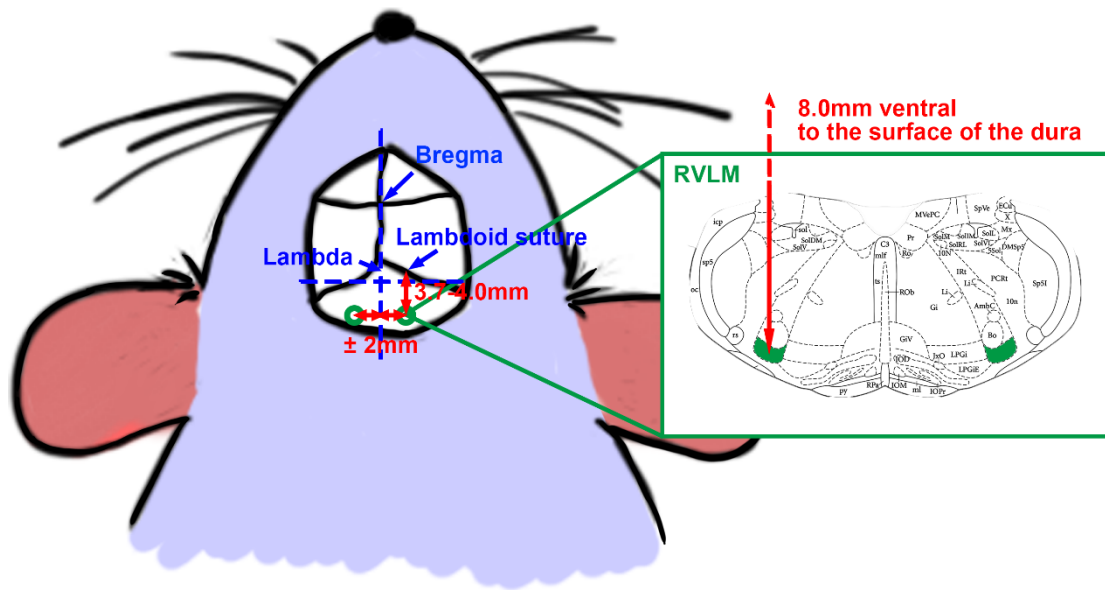

**Figure S1** The diagram which was used to demonstrate the process of confirming the correct positioning of the RVLM.

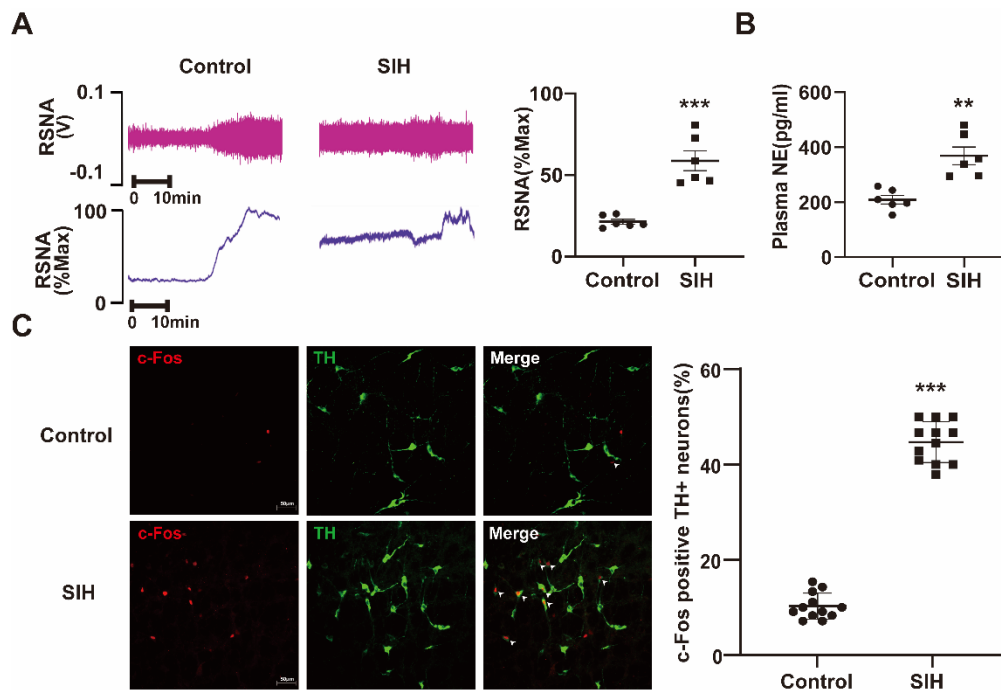

**Figure S2 (A–C)** Chronic stress increased RSNA, plasma NE and c-Fos-positive TH<sup>+</sup> neurons in rats. Data were presented as mean ± SEM. Statistical significance was determined by two-tailed unpaired Student's *t*-test (A–C). *n* = 6 rats per group (A, B). *n* = 12 slices from 6 rats, two slices per rat (C). \*\**p* < 0.01, \*\*\**p* < 0.001 versus control group. Abbreviations: NE, norepinephrine; RSNA, renal sympathetic nerve activity; SEM, standard error of the mean; SIH, stress-induced hypertension; TH, tyrosine hydroxylase.

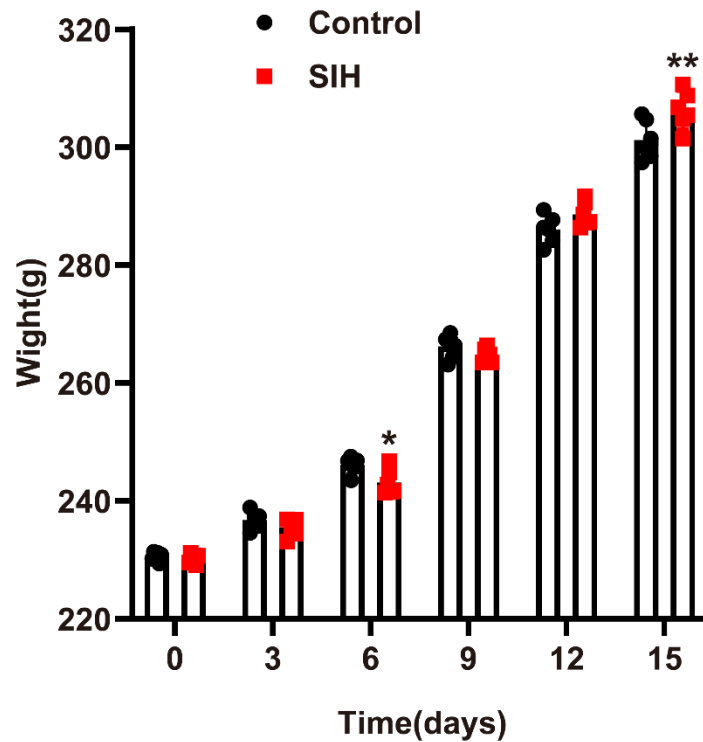

**Figure S3** Variability in body weight between SIH and control rats. Data were presented as mean  $\pm$  SEM. Statistical significance was determined by two-tailed unpaired Student's *t*-test.  $n = 6$  rats per group. \* $p < 0.05$ , \*\* $p < 0.01$  versus control group. Abbreviations: SEM, standard error of the mean; SIH, stress-induced hypertension.

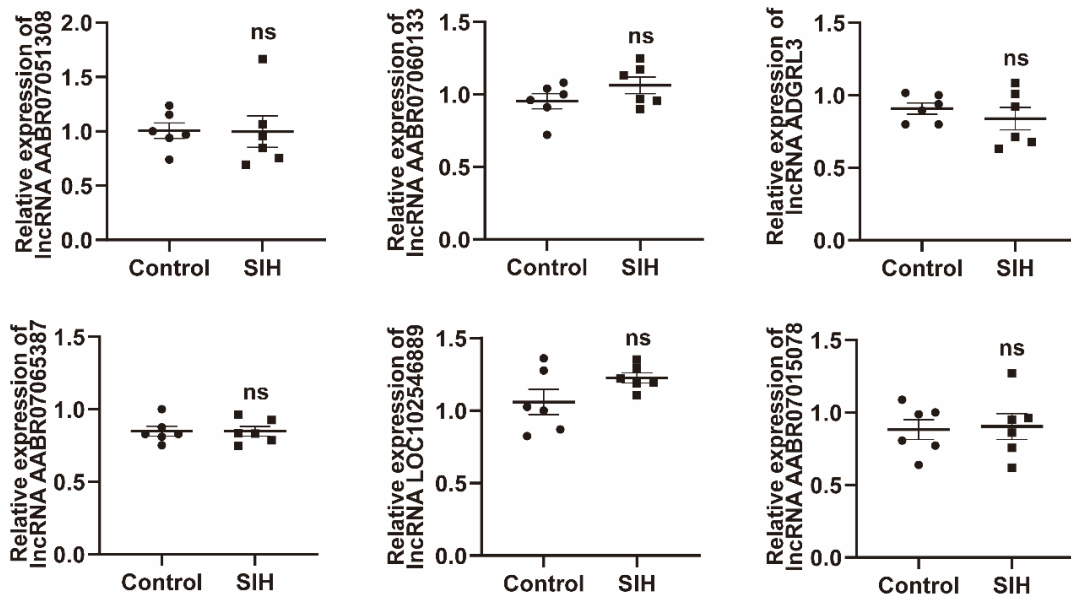

**Figure S4** Relative expression of the 6 indicated lncRNAs listed in Figure 2B measured by qRT-PCR. Data were presented as mean  $\pm$  SEM. Statistical significance was determined by two-tailed unpaired Student's *t*-test.  $n = 6$  rats per group. ns means nonsignificant versus control group. Abbreviations: qRT-PCR, quantitative reverse transcription polymerase chain reaction; SEM, standard error of the mean; SIH, stress-induced hypertension.

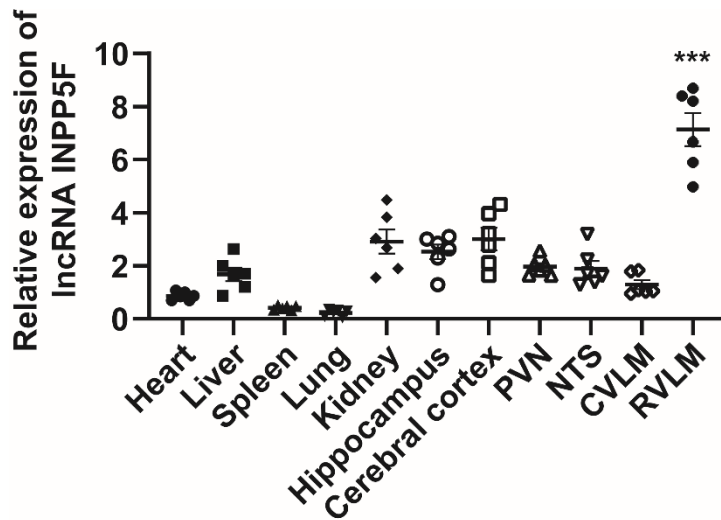

**Figure S5** Relative expression of lncRNA INPP5F in 11 tissues of control rats measured by qRT-PCR. Data were presented as mean  $\pm$  SEM. Statistical significance was determined by two-tailed unpaired Student's *t*-test.  $n = 6$  rats per group. \*\*\*  $p < 0.001$  versus heart group. Abbreviations: qRT-PCR, quantitative reverse transcription polymerase chain reaction; SEM, standard error of the mean.

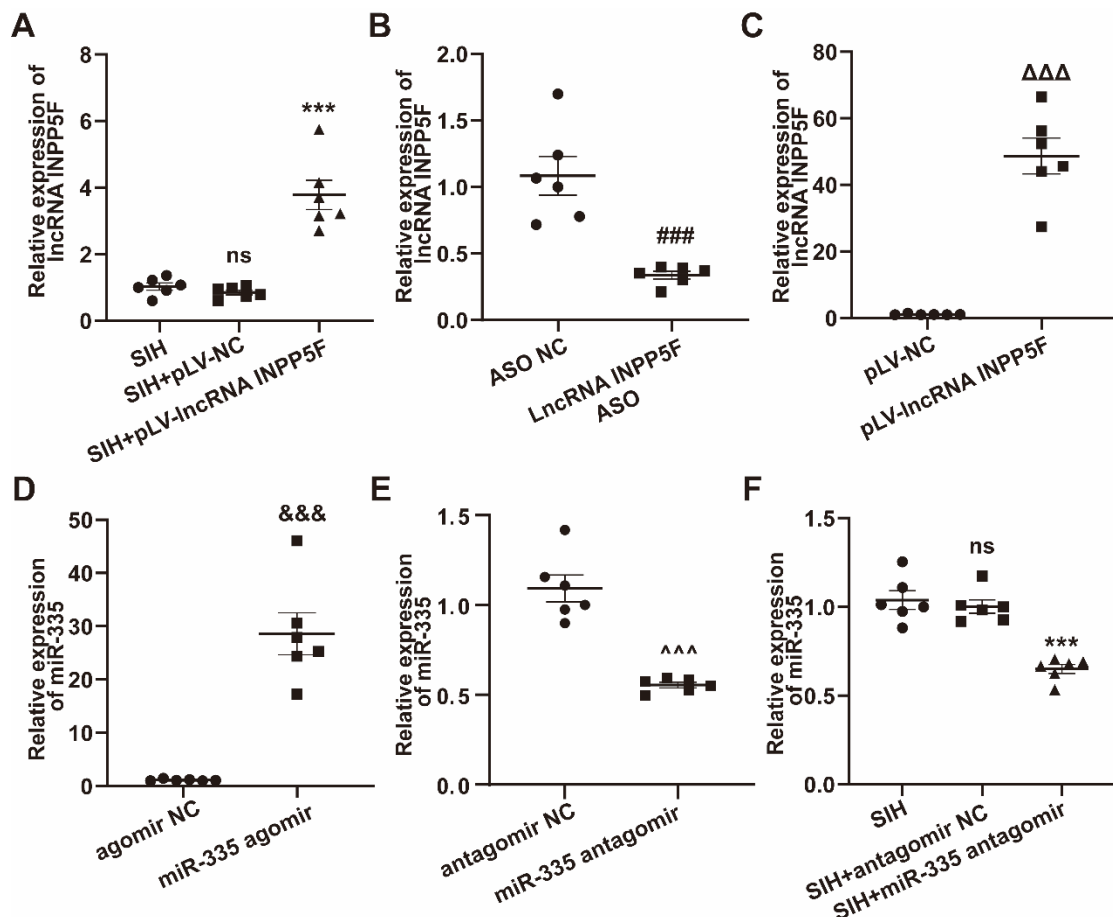

**Figure S6** (A) lncRNA INPP5F overexpression efficiency in RVLM, as determined by qRT-PCR. (B) qRT-PCR analysis of lncRNA INPP5F expression in B104 cells after being transfected with lncRNA INPP5F ASO. (C) Overexpression efficiency of lncRNA INPP5F, as determined by qRT-PCR, in B104 cells. (D, E) qRT-PCR assay to assess the overexpression and knockdown efficiency

of miR-335 in B104 cells. (F) Evaluation of miR-335 silencing efficiency in RVLM by qRT-PCR. Data were presented as mean  $\pm$  SEM. Statistical significance was determined by two-tailed unpaired Student's *t*-test (B–E) and one-way ANOVA, followed by post-hoc Bonferroni test (A, F). *n* = 6 rats per group (A, F). *n*=6 of independent cell culture preparations (B–E). \*\*\**p* < 0.001, ns means nonsignificant versus SIH group. ###*p* < 0.001 versus ASO NC group.  $\Delta\Delta\Delta p$  < 0.001 versus pLV-NC group. &&&*p* < 0.001 versus agomir NC group.  $\wedge\wedge p$  < 0.001, versus antagomir NC group. Abbreviations: ASO, antisense oligonucleotide; NC, negative control; qRT-PCR, quantitative reverse transcription polymerase chain reaction; RVLM, rostral ventrolateral medulla; SEM, standard error of the mean; SIH, stress-induced hypertension.

## Supplementary Tables

**Table S1** LncRNA INPP5F ASO, miR-335 agomir, agomir NC, miR-335 antagomir, antagomir NC used for intra-RVLM microinjection and cell transfection

| Accession No.     | Sequence (5'-3')                                   |
|-------------------|----------------------------------------------------|
| LncRNA INPP5F ASO | CTTCAGAAGGCTAGTGATGG                               |
| miR-335 agomir    | UCAAGAGCAAUAACGAAAAAUGU<br>AUUUUUCGUUAUUGCUCUUGAUU |
| agomir NC         | UUUAAAGAACGUCUCAGGUUU<br>ACGUGACACGUUCGAGAAUU      |
| miR-335 antagomir | ACAUUUUUCGUUAUUGCUCUUGA                            |
| antagomir NC      | CAGUACUUUUGUGUAGUACAA                              |

Abbreviations: ASO, antisense oligonucleotide; NC, negative control; RVLM, rostral ventrolateral medulla.

**Table S2** The full statistical reports.

| item                                                       | Degrees of freedom (df) | <i>t</i> / <i>F</i> value | <i>P</i> value |
|------------------------------------------------------------|-------------------------|---------------------------|----------------|
| Figure 2A                                                  |                         |                           |                |
|                                                            | Degrees of freedom (df) | <i>t</i> value            | <i>P</i> value |
| Systolic blood pressure (SBP) before stress                | 10                      | 0.7545                    | 0.4686         |
| Systolic blood pressure (SBP) on the 5th day after stress  | 10                      | 3.019                     | 0.0129         |
| Systolic blood pressure (SBP) on the 10th day after stress | 10                      | 14.47                     | <0.0001        |
| Systolic blood pressure (SBP) on the 15th day after stress | 10                      | 10.36                     | <0.0001        |
| Mean arterial pressure (MAP) before stress                 | 10                      | 0.05631                   | 0.9562         |
| Mean arterial pressure (MAP) on the 5th day after stress   | 10                      | 2.854                     | 0.0171         |
| Mean arterial pressure (MAP) on the 10th day after stress  | 10                      | 9.358                     | <0.0001        |
| Mean arterial pressure (MAP) on the 15th day after stress  | 10                      | 21.1                      | <0.0001        |
| Heart rate (HR) before stress                              | 10                      | 0.008695                  | 0.9324         |
| Heart rate (HR) on the 5th day after stress                | 10                      | 0.5905                    | 0.5679         |
| Heart rate (HR) on the 10th day after stress               | 10                      | 4.29                      | 0.0016         |
| Heart rate (HR) on the 15th day after stress               | 10                      | 6.969                     | <0.0001        |
| Figure 2C                                                  |                         |                           |                |
|                                                            | Degrees of freedom (df) | <i>t</i> value            | <i>P</i> value |
| Relative expression of lncRNA INPP5F                       | 10                      | 6.399                     | <0.0001        |
| Relative expression of lncRNA ST3GAL4                      | 10                      | 3.361                     | 0.0072         |

|                                            |    |       |        |
|--------------------------------------------|----|-------|--------|
| Relative expression of lncRNA WAP1         | 10 | 2.545 | 0.0291 |
| Relative expression of lncRNA AABR07068852 | 10 | 3.09  | 0.0114 |

Figure 2D

|                                      | Degrees of freedom (df) | F value | P value |
|--------------------------------------|-------------------------|---------|---------|
| Relative expression of lncRNA INPP5F | df1=10; df2=55          | 63.23   | <0.0001 |

Figure 3A

|                                                            | Degrees of freedom (df) | F value | P value |
|------------------------------------------------------------|-------------------------|---------|---------|
| Systolic blood pressure (SBP) before stress                | df1=2; df2=15           | 0.4578  | 0.6412  |
| Systolic blood pressure (SBP) on the 5th day after stress  | df1=2; df2=15           | 10.03   | 0.0017  |
| Systolic blood pressure (SBP) on the 10th day after stress | df1=2; df2=15           | 84.31   | <0.0001 |
| Systolic blood pressure (SBP) on the 15th day after stress | df1=2; df2=15           | 22.69   | <0.0001 |
| Mean arterial pressure (MAP) before stress                 | df1=2; df2=15           | 0.2223  | 0.8032  |
| Mean arterial pressure (MAP) on the 5th day after stress   | df1=2; df2=15           | 9.57    | 0.0021  |
| Mean arterial pressure (MAP) on the 10th day after stress  | df1=2; df2=15           | 68.92   | <0.0001 |
| Mean arterial pressure (MAP) on the 15th day after stress  | df1=2; df2=15           | 34.87   | <0.0001 |
| Heart rate (HR) before stress                              | df1=2; df2=15           | 0.08432 | 0.9196  |
| Heart rate (HR) on the 5th day after stress                | df1=2; df2=15           | 0.3066  | 0.7404  |
| Heart rate (HR) on the 10th day after stress               | df1=2; df2=15           | 51.4    | <0.0001 |
| Heart rate (HR) on the 15th day after stress               | df1=2; df2=15           | 33.83   | <0.0001 |

Figure 3B

|                                               | Degrees of freedom (df) | F value | P value |
|-----------------------------------------------|-------------------------|---------|---------|
| Renal sympathetic nerve activity (RSNA, %Max) | df1=2; df2=15           | 8.998   | 0.0027  |

Figure 3C

|                            | Degrees of freedom (df) | F value | P value |
|----------------------------|-------------------------|---------|---------|
| Plasma norepinephrine (NE) | df1=2; df2=15           | 9.575   | 0.0021  |

Figure 3D

|                                | Degrees of freedom (df) | F value | P value |
|--------------------------------|-------------------------|---------|---------|
| c-Fos-positive TH+ neurons (%) | df1=2; df2=33           | 29.03   | <0.0001 |

Figure 4A

|                                       | Degrees of freedom (df) | t value | P value |
|---------------------------------------|-------------------------|---------|---------|
| Relative protein expression of Ctnn   | 4                       | 7.648   | 0.0016  |
| Relative protein expression of p-PI3K | 4                       | 2.934   | 0.0427  |
| Relative protein expression of p-AKT  | 4                       | 3.264   | 0.031   |

Figure 4B

|                                                  | Degrees of freedom (df) | F value | P value |
|--------------------------------------------------|-------------------------|---------|---------|
| Relative protein expression of Ctnn              | df1=2; df2=6            | 15.45   | 0.0043  |
| Relative protein expression of p-PI3K            | df1=2; df2=6            | 33.13   | 0.0006  |
| Relative protein expression of p-AKT             | df1=2; df2=6            | 12.28   | 0.0076  |
| Relative protein expression of BCL2              | df1=2; df2=6            | 12.99   | 0.0066  |
| Relative protein expression of BAX               | df1=2; df2=6            | 33.88   | 0.0005  |
| Relative protein expression of cleaved Caspase 3 | df1=2; df2=6            | 96.06   | <0.0001 |

Figure 4C

|                                             | Degrees of freedom (df) | F value | P value |
|---------------------------------------------|-------------------------|---------|---------|
| Cleaved caspase 3-positive neural cells (%) | df1=2; df2=33           | 51.76   | <0.0001 |

Figure 4D

|                                 | Degrees of freedom (df) | <i>F</i> value | <i>P</i> value |
|---------------------------------|-------------------------|----------------|----------------|
| TUNEL-positive neural cells (%) | df1=2; df2=33           | 195.5          | <0.0001        |

Figure 5A

|                                                  | Degrees of freedom (df) | <i>t</i> value | <i>P</i> value |
|--------------------------------------------------|-------------------------|----------------|----------------|
| Relative protein expression of Ctnn              | 4                       | 6.25           | 0.0033         |
| Relative protein expression of p-PI3K            | 4                       | 8.256          | 0.0012         |
| Relative protein expression of p-AKT             | 4                       | 6.857          | 0.0024         |
| Relative protein expression of BCL2              | 4                       | 4.348          | 0.0122         |
| Relative protein expression of BAX               | 4                       | 6.784          | 0.0025         |
| Relative protein expression of cleaved Caspase 3 | 4                       | 3.398          | 0.0273         |

Figure 5B

|                                      | Degrees of freedom (df) | <i>t</i> value | <i>P</i> value |
|--------------------------------------|-------------------------|----------------|----------------|
| Cleaved caspase 3-positive cells (%) | 22                      | 13.12          | <0.0001        |

Figure 5C

|                          | Degrees of freedom (df) | <i>t</i> value | <i>P</i> value |
|--------------------------|-------------------------|----------------|----------------|
| TUNEL-positive cells (%) | 22                      | 23.36          | <0.0001        |

Figure 5D

|                    | Degrees of freedom (df) | <i>t</i> value | <i>P</i> value |
|--------------------|-------------------------|----------------|----------------|
| Cell viability (%) | 22                      | 12.41          | <0.0001        |

Figure 5E

|                        | Degrees of freedom (df) | <i>t</i> value | <i>P</i> value |
|------------------------|-------------------------|----------------|----------------|
| 48h cell viability (%) | 10                      | 8.735          | <0.0001        |
| 72h cell viability (%) | 10                      | 13.7           | <0.0001        |
| 96h cell viability (%) | 10                      | 15.36          | <0.0001        |

Figure 5F

|                     | Degrees of freedom (df) | <i>t</i> value | <i>P</i> value |
|---------------------|-------------------------|----------------|----------------|
| Apoptosis cells (%) | 10                      | 11.58          | <0.0001        |

Figure 6A

|                                | Degrees of freedom (df) | <i>t</i> value | <i>P</i> value |
|--------------------------------|-------------------------|----------------|----------------|
| Relative expression of miR-335 | 10                      | 3.961          | 0.0027         |

Figure 6C

|                                      | Degrees of freedom (df) | <i>t</i> value | <i>P</i> value |
|--------------------------------------|-------------------------|----------------|----------------|
| Relative enrichment of lncRNA INPP5F | 10                      | 10.84          | <0.0001        |
| Relative enrichment of GAPDH         | 10                      | 0.6728         | 0.5163         |

Figure 6D

|                                                   | Degrees of freedom (df) | <i>t</i> value | <i>P</i> value |
|---------------------------------------------------|-------------------------|----------------|----------------|
| Relative luciferase activity of lncRNA INPP5F-WT  | 10                      | 18.12          | <0.0001        |
| Relative luciferase activity of lncRNA INPP5F-MUT | 10                      | 0.1307         | 0.8986         |

Figure 6E

|                                | Degrees of freedom (df) | <i>t</i> value | <i>P</i> value |
|--------------------------------|-------------------------|----------------|----------------|
| Relative expression of miR-335 | 10                      | 4.339          | 0.0015         |

Figure 6F

|  | Degrees of freedom (df) | <i>t</i> value | <i>P</i> value |
|--|-------------------------|----------------|----------------|
|--|-------------------------|----------------|----------------|

|                                                 |                         |                |                |
|-------------------------------------------------|-------------------------|----------------|----------------|
| Relative expression of miR-335                  | 10                      | 4.247          | 0.0017         |
| Figure 6G                                       |                         |                |                |
|                                                 | Degrees of freedom (df) | <i>F</i> value | <i>P</i> value |
| Relative expression of miR-335                  | df1=2; df2=15           | 13.57          | 0.0004         |
| Figure 7B                                       |                         |                |                |
|                                                 | Degrees of freedom (df) | <i>t</i> value | <i>P</i> value |
| Relative luciferase activity of Ctnn-WT-3' UTR  | 10                      | 4.817          | 0.0007         |
| Relative luciferase activity of Ctnn-MUT-3' UTR | 10                      | 1.55           | 0.1521         |
| Figure 7C                                       |                         |                |                |
|                                                 | Degrees of freedom (df) | <i>t</i> value | <i>P</i> value |
| Relative mRNA expression of Ctnn                | 10                      | 5.517          | 0.0003         |
| Figure 7D                                       |                         |                |                |
|                                                 | Degrees of freedom (df) | <i>t</i> value | <i>P</i> value |
| Relative protein expression of Ctnn             | 4                       | 4.743          | 0.009          |
| Figure 7E                                       |                         |                |                |
|                                                 | Degrees of freedom (df) | <i>t</i> value | <i>P</i> value |
| Relative mRNA expression of Ctnn                | 10                      | 7.032          | <0.0001        |
| Figure 7F                                       |                         |                |                |
|                                                 | Degrees of freedom (df) | <i>t</i> value | <i>P</i> value |
| Relative protein expression of Ctnn             | 4                       | 8.429          | 0.0011         |
| Figure 7G                                       |                         |                |                |
|                                                 | Degrees of freedom (df) | <i>F</i> value | <i>P</i> value |
| Relative mRNA expression of Ctnn                | df1=2; df2=15           | 13.55          | 0.0004         |
| Figure 7H                                       |                         |                |                |
|                                                 | Degrees of freedom (df) | <i>F</i> value | <i>P</i> value |
| Relative protein expression of Ctnn             | df1=2; df2=6            | 15.05          | 0.0046         |
| Figure 8A                                       |                         |                |                |
|                                                 | Degrees of freedom (df) | <i>F</i> value | <i>P</i> value |
| Relative mRNA expression of Ctnn                | df1=2; df2=15           | 23.59          | <0.0001        |
| Figure 8B                                       |                         |                |                |
|                                                 | Degrees of freedom (df) | <i>F</i> value | <i>P</i> value |
| Relative protein expression of Ctnn             | df1=2; df2=6            | 6.342          | 0.0331         |
| Figure 8C                                       |                         |                |                |
|                                                 | Degrees of freedom (df) | <i>F</i> value | <i>P</i> value |
| Relative mRNA expression of Ctnn                | df1=2; df2=15           | 10.99          | 0.0011         |
| Figure 8D                                       |                         |                |                |
|                                                 | Degrees of freedom (df) | <i>F</i> value | <i>P</i> value |
| Relative protein expression of Ctnn             | df1=2; df2=6            | 17.31          | 0.0032         |
| Figure 8E                                       |                         |                |                |
|                                                 | Degrees of freedom (df) | <i>F</i> value | <i>P</i> value |
| Relative mRNA expression of Ctnn                | df1=2; df2=15           | 13.18          | 0.0005         |
| Figure 8F                                       |                         |                |                |
|                                                 | Degrees of freedom (df) | <i>F</i> value | <i>P</i> value |
| Relative protein expression of Ctnn             | df1=2; df2=6            | 5.523          | 0.0436         |

Figure S2A

|                                               | Degrees of freedom (df) | <i>t</i> value | <i>P</i> value |
|-----------------------------------------------|-------------------------|----------------|----------------|
| Renal sympathetic nerve activity (RSNA, %Max) | 10                      | 5.97           | 0.0001         |

Figure S2B

|                            | Degrees of freedom (df) | <i>t</i> value | <i>P</i> value |
|----------------------------|-------------------------|----------------|----------------|
| Plasma norepinephrine (NE) | 10                      | 4.516          | 0.0011         |

Figure S2C

|                                | Degrees of freedom (df) | <i>t</i> value | <i>P</i> value |
|--------------------------------|-------------------------|----------------|----------------|
| c-Fos-positive TH+ neurons (%) | 22                      | 23.37          | <0.0001        |

Figure S3

|                                      | Degrees of freedom (df) | <i>t</i> value | <i>P</i> value |
|--------------------------------------|-------------------------|----------------|----------------|
| weight before stress                 | 10                      | 0.6395         | 0.5369         |
| weight on the third day after stress | 10                      | 1.533          | 0.1564         |
| weight on the 6th day after stress   | 10                      | 2.798          | 0.0189         |
| weight on the 9th day after stress   | 10                      | 1.621          | 0.136          |
| weight on the 12th day after stress  | 10                      | 1.959          | 0.0785         |
| weight on the 15th day after stress  | 10                      | 3.305          | 0.0079         |

Figure S4

|                                            | Degrees of freedom (df) | <i>t</i> value | <i>P</i> value |
|--------------------------------------------|-------------------------|----------------|----------------|
| Relative expression of lncRNA AABR07051308 | 10                      | 0.05925        | 0.9539         |
| Relative expression of lncRNA AABR07060133 | 10                      | 1.417          | 0.1869         |
| Relative expression of lncRNA ADGRL3       | 10                      | 0.7972         | 0.4439         |
| Relative expression of lncRNA AABR07065387 | 10                      | 0.02457        | 0.9809         |
| Relative expression of lncRNA LOC102546889 | 10                      | 1.746          | 0.1115         |
| Relative expression of lncRNA AABR07015078 | 10                      | 0.1856         | 0.8565         |

Figure S5

|                                      | Degrees of freedom (df) | <i>t</i> value | <i>P</i> value |
|--------------------------------------|-------------------------|----------------|----------------|
| Relative expression of lncRNA INPP5F | df1=10; df2=55          | 37.43          | <0.0001        |

Figure S6A

|                                      | Degrees of freedom (df) | <i>F</i> value | <i>P</i> value |
|--------------------------------------|-------------------------|----------------|----------------|
| Relative expression of lncRNA INPP5F | df1=2; df2=15           | 38.26          | <0.0001        |

Figure S6B

|                                      | Degrees of freedom (df) | <i>t</i> value | <i>P</i> value |
|--------------------------------------|-------------------------|----------------|----------------|
| Relative expression of lncRNA INPP5F | 10                      | 5.013          | 0.0005         |

Figure S6C

|                                      | Degrees of freedom (df) | <i>t</i> value | <i>P</i> value |
|--------------------------------------|-------------------------|----------------|----------------|
| Relative expression of lncRNA INPP5F | 10                      | 8.858          | <0.0001        |

Figure S6D

|                                | Degrees of freedom (df) | <i>t</i> value | <i>P</i> value |
|--------------------------------|-------------------------|----------------|----------------|
| Relative expression of miR-335 | 10                      | 6.961          | <0.0001        |

Figure S6E

|                                | Degrees of freedom (df) | <i>t</i> value | <i>P</i> value |
|--------------------------------|-------------------------|----------------|----------------|
| Relative expression of miR-335 | 10                      | 6.999          | <0.0001        |

Figure S6F



|                                | Degrees of freedom (df) | <i>F</i> value | <i>P</i> value |
|--------------------------------|-------------------------|----------------|----------------|
| Relative expression of miR-335 | df1=2; df2=15           | 28.5           | <0.0001        |

---

Abbreviations: MUT, mutant; TH, tyrosine hydroxylase; TUNEL, TdT-mediated dUTP-biotin nick end labeling; WT, wild-type.
